# Supplementary material for: Antinociceptive Efficacy of the µ-Opioid/Nociceptin Peptide-Based Hybrid KGNOP1 in Inflammatory Pain without Rewarding Effects in Mice: An Experimental Assessment and Molecular Docking
Source: MDPI journal article supplement (doi:10.3390/molecules26113267), 2021-05-28
Supplement: s1 [file s1]

# **Antinociceptive efficacy of the $\mu$ -opioid/nociceptin peptide-based hybrid KGNOP1 in inflammatory pain without rewarding effects in mice: An experimental assessment and molecular docking**

Maria Dumitrascuta<sup>1</sup>, Marcel Bermudez<sup>2</sup>, Olga Trovato<sup>1</sup>, Jolien De Neve<sup>3</sup>, Steven Ballet<sup>3</sup>, Gerhard Wolber<sup>2</sup> and Mariana Spetea<sup>1,\*</sup>

<sup>1</sup> Department of Pharmaceutical Chemistry, Institute of Pharmacy and Center for Molecular Biosciences Innsbruck (CMBI), University of Innsbruck, Innrain 80-82, 6020 Innsbruck, Austria

<sup>2</sup> Institute of Pharmacy, Freie Universität Berlin, Königin-Luise-Str. 2+4, D-14195 Berlin, Germany

<sup>3</sup> Research Group of Organic Chemistry, Departments of Chemistry and Bioengineering Sciences, Vrije Universiteit Brussel, Pleinlaan 2, B-1050 Brussels, Belgium

## **\*Correspondence:**

Mariana Spetea

Department of Pharmaceutical Chemistry, Institute of Pharmacy and Center for Molecular Biosciences (CMBI), University of Innsbruck, Innrain 80-82, 6020 Innsbruck, Austria; Tel.: +43 512 507 58277; Fax: +43 512 507 58299; e-mail: mariana.spetea@uibk.ac.at

**Table S1.** Antinociceptive effect of KGNOP1 and morphine after s.c. administration in the formalin test in mice

| Treatment<br>Dose                                | Phase I<br>%Antinociceptive effect | Phase II<br>%Antinociceptive effect |
|--------------------------------------------------|------------------------------------|-------------------------------------|
| KGNOP1                                           |                                    |                                     |
| 0.12 $\mu\text{mol/kg}$                          | $33.9 \pm 3.8$                     | $2.3 \pm 11.1$                      |
| 0.49 $\mu\text{mol/kg}$                          | $33.7 \pm 9.3$                     | $51.8 \pm 9.7$                      |
| 1.22 $\mu\text{mol/kg}$                          | $55.6 \pm 7.3$                     | $71.4 \pm 6.8$                      |
| ED <sub>50</sub> ( $\mu\text{mol/kg}$ ) (95% CL) | 1.17 (0.41-3.35)                   | 0.55 (0.22-1.33)                    |
| Morphine                                         |                                    |                                     |
| 3.11 $\mu\text{mol/kg}$                          | $19.4 \pm 6.7$                     | $24.8 \pm 11.6$                     |
| 7.77 $\mu\text{mol/kg}$                          | $32.6 \pm 5.7$                     | $57.5 \pm 8.3$                      |
| 15.5 $\mu\text{mol/kg}$                          | $38.4 \pm 10.9$                    | $79.1 \pm 7.5$                      |
| ED <sub>50</sub> ( $\mu\text{mol/kg}$ ) (95% CL) | - <sup>a</sup>                     | 6.44 (3.20-12.7)                    |

Data are shown as percent (%) antinociceptive effect calculated for the acute nociceptive pain (Phase I, 0-5 min) and inflammatory pain (Phase II, 15-60 min) as:  $100 \times [(C - T)/C]$ , where  $C$  is the mean time in control (saline) group and  $T$  is the time in drug-treated group. The antinociceptive effective dose (ED<sub>50</sub>) and 95% confidence limit (CL) values were calculated using linear regression. -<sup>a</sup> not calculable. Values represent the mean  $\pm$  SEM (n = 6-8 mice per group).

**Table S2.** Antinociceptive effect of KGNOP1 and morphine after s.c. administration to mice with CFA-induced inflammatory pain

| Treatment<br>Dose                             | 30 min              | 1 h                | 2 h                | 3 h                 | 4 h                | 5 h                 | 6 h                 | 7 h                | 8 h                 | 24 h                |
|-----------------------------------------------|---------------------|--------------------|--------------------|---------------------|--------------------|---------------------|---------------------|--------------------|---------------------|---------------------|
| <b>Thermal sensitivity (Hargreaves test)</b>  |                     |                    |                    |                     |                    |                     |                     |                    |                     |                     |
| KGNOP1                                        |                     |                    |                    |                     |                    |                     |                     |                    |                     |                     |
| 0.49 $\mu\text{mol/kg}$                       | 23.5<br>$\pm 12.0$  | 38.1<br>$\pm 12.5$ | 59.8<br>$\pm 16.2$ | 40.2<br>$\pm 7.7$   | 25.4<br>$\pm 7.3$  | 15.7<br>$\pm 8.0$   | 9.3<br>$\pm 6.0$    | -1.46<br>$\pm 4.4$ | 6.12<br>$\pm 3.5$   | -3.79<br>$\pm 4.5$  |
| 1.22 $\mu\text{mol/kg}$                       | 31.9<br>$\pm 11.0$  | 54.4<br>$\pm 12.3$ | 98.6<br>$\pm 16.2$ | 78.6<br>$\pm 11.5$  | 58.2<br>$\pm 11.2$ | 26.0<br>$\pm 7.2$   | 26.7<br>$\pm 9.4$   | 10.2<br>$\pm 5.2$  | 9.15<br>$\pm 5.4$   | 6.72<br>$\pm 3.7$   |
| Morphine                                      |                     |                    |                    |                     |                    |                     |                     |                    |                     |                     |
| 15.5 $\mu\text{mol/kg}$                       | 68.6<br>$\pm 2.8$   | 36.1<br>$\pm 3.6$  | 19.6<br>$\pm 2.8$  | 13.8<br>$\pm 0.5$   | -1.96<br>$\pm 2.3$ | 0.43<br>$\pm 1.5$   | -0.40<br>$\pm 2.6$  | -                  | -                   | 0.00<br>$\pm 0.6$   |
| <b>Mechanical sensitivity (von Frey test)</b> |                     |                    |                    |                     |                    |                     |                     |                    |                     |                     |
| KGNOP1                                        |                     |                    |                    |                     |                    |                     |                     |                    |                     |                     |
| 1.22 $\mu\text{mol/kg}$                       | -6.71<br>$\pm 23.2$ | 65.4<br>$\pm 21.2$ | 19.1<br>$\pm 24.1$ | -8.73<br>$\pm 31.8$ | 21.1<br>$\pm 40.6$ | -0.50<br>$\pm 25.8$ | -12.9<br>$\pm 26.6$ | -8.30<br>$\pm 7.3$ | -2.42<br>$\pm 26.5$ | -8.66<br>$\pm 18.4$ |
| Morphine                                      |                     |                    |                    |                     |                    |                     |                     |                    |                     |                     |
| 15.5 $\mu\text{mol/kg}$                       | 63.4<br>$\pm 10.2$  | 50.6<br>$\pm 16.7$ | 18.9<br>$\pm 7.5$  | 6.62<br>$\pm 9.6$   | 1.57<br>$\pm 3.3$  | 11.7<br>$\pm 6.5$   | -2.29<br>$\pm 6.0$  | - <sup>a</sup>     | - <sup>a</sup>      | 1.68<br>$\pm 9.0$   |

Data are shown as percentages (%) reversal of thermal/mechanical sensitivity calculated as:  $100 \times [(T_1 - T_0)/(T_{BL} - T_0)]$ , where  $T_0$  is the nociceptive value at 72 hours post-inoculation with CFA (defined as 0 hours),  $T_1$  is the value obtained following drug administration and  $T_{BL}$  is the basal value before CFA inoculation. -<sup>a</sup> not determined. Values represent the mean  $\pm$  SEM (n = 6-8 mice per group).

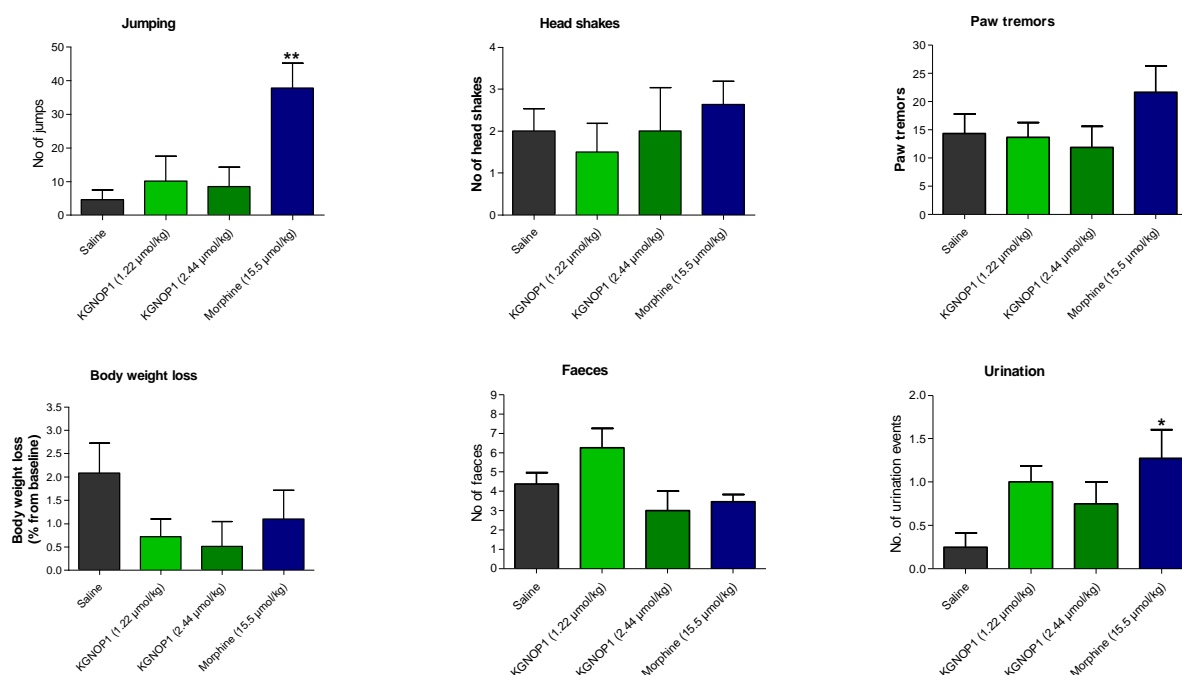

**Figure S1.** Effect of KGNOP1 and morphine on naloxone-precipitated withdrawal syndrome in mice after s.c. administration. Groups of mice received saline (control), KGNOP1 or morphine, daily for 5 days. Naloxone (1 mg/kg, s.c.) was injected two hours after last drug treatment to precipitate withdrawal signs. Number of occurring events were recorded for 15 min after naloxone administration. Data are presented as the mean  $\pm$  SEM ( $n = 8$  mice per group). \* $P < 0.05$  and \*\* $P < 0.01$  vs. saline group, one-way ANOVA followed by Dunnett's *post-hoc* test.
